# Supplementary material for: A Multifaceted Approach for Evaluating Hepatitis E Virus Infectivity In Vitro: Cell Culture and Innovative Molecular Methods for Integrity Assessment
Source: MDPI journal article supplement (doi:10.3390/vetsci10120676), 2023-11-27
Supplement: s1 [file s1]

**A**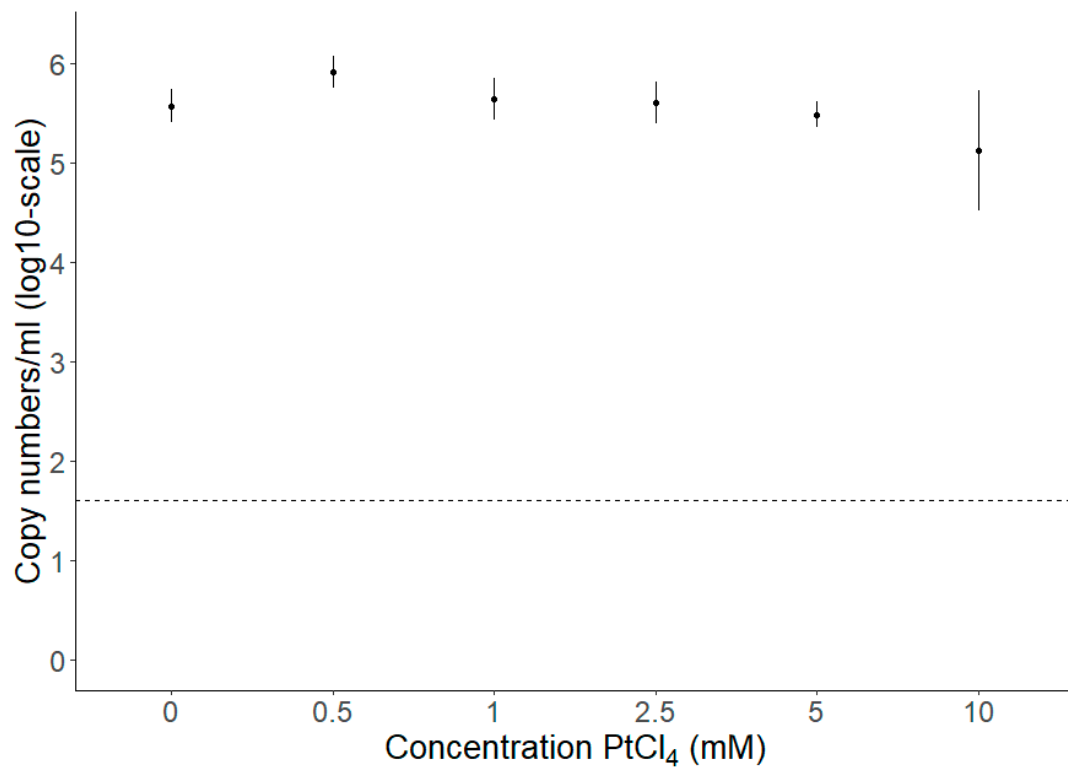**B**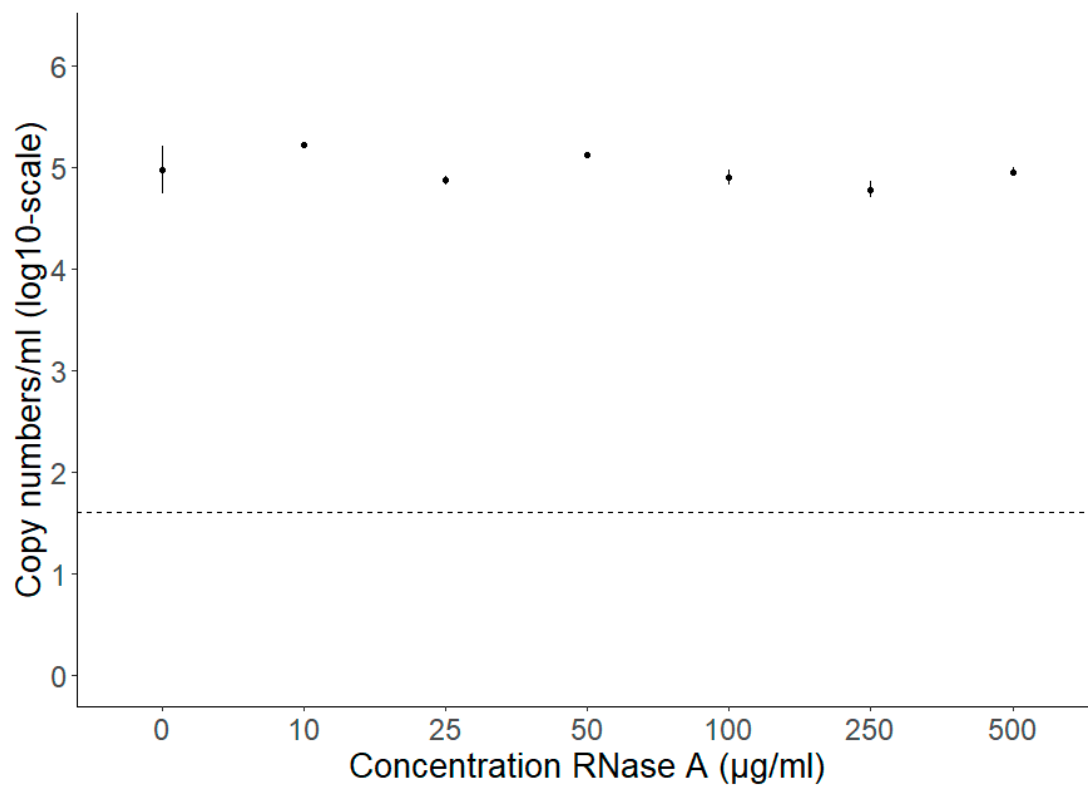

Figure S1: PtCl<sub>4</sub> (A) and RNase A (B) do not enter viral particles with intact capsids. No difference is observed in RNA detection when HEV positive serum samples are treated with different concentrations. Displayed as means and SE (n = 4 for PtCl<sub>4</sub> and 2 for RNase A). The dotted line represents the detection limit of the RT-qPCR.
